# Supplementary material
Source: publisher site journal article supplement (https://www.dovepress.com/article/542680)
Supplement: Supplementary file 1 [file Supplementary%20marterials.pdf]

Supplementary table 1 Different models performance in different cohorts

| Cohort              | Model          | AUC      | AUC 95% CI<br>Lower | AUC 95% CI<br>Upper | Accuracy | F1       | Sensitivity | Specificity | PPV      | NPV      |
|---------------------|----------------|----------|---------------------|---------------------|----------|----------|-------------|-------------|----------|----------|
| Internal training   | Combined Model | 0.981085 | 0.961628            | 1                   | 0.919811 | 0.912821 | 0.917526    | 0.921739    | 0.908163 | 0.929825 |
| Internal training   | Logical Score  | 0.592918 | 0.515985            | 0.669851            | 0.599057 | 0.484848 | 0.412371    | 0.756522    | 0.588235 | 0.604167 |
| Internal training   | Tumor Score    | 0.517078 | 0.438875            | 0.59528             | 0.490566 | 0.5      | 0.556701    | 0.434783    | 0.453782 | 0.537634 |
| Internal training   | Tenon Score    | 0.648947 | 0.574414            | 0.72348             | 0.580189 | 0.597285 | 0.680412    | 0.495652    | 0.532258 | 0.647727 |
| Internal validation | Combined Model | 0.974747 | 0.937844            | 1                   | 0.901099 | 0.873239 | 0.861111    | 0.927273    | 0.885714 | 0.910714 |
| Internal validation | Logical Score  | 0.692424 | 0.578654            | 0.806195            | 0.681319 | 0.508475 | 0.416667    | 0.854545    | 0.652174 | 0.691176 |
| Internal validation | Tumor Score    | 0.582828 | 0.461537            | 0.704119            | 0.538462 | 0.543478 | 0.694444    | 0.436364    | 0.446429 | 0.685714 |
| Internal validation | Tenon Score    | 0.69899  | 0.585929            | 0.812051            | 0.626374 | 0.613636 | 0.75        | 0.545455    | 0.519231 | 0.769231 |
| External validation | Combined Model | 0.987205 | 0.962558            | 1                   | 0.931373 | 0.917647 | 0.95122     | 0.918033    | 0.886364 | 0.965517 |
| External validation | Logical Score  | 0.52579  | 0.410773            | 0.640807            | 0.617647 | 0.4      | 0.317073    | 0.819672    | 0.541667 | 0.641026 |
| External validation | Tumor Score    | 0.583766 | 0.469685            | 0.697848            | 0.558824 | 0.536082 | 0.634146    | 0.508197    | 0.464286 | 0.673913 |
| External validation | Tenon Score    | 0.70032  | 0.594198            | 0.806441            | 0.637255 | 0.602151 | 0.682927    | 0.606557    | 0.538462 | 0.74     |

2 AUC: area under curve. CI: Confidence Interval. PPV: Positive predict value. NPV: Negative predict value.

Supplementary table 2 Calibration performance in different cohort

| Cohort              | Model          | Brier score | HL p-value  | Calibration intercept | Calibration slope |
|---------------------|----------------|-------------|-------------|-----------------------|-------------------|
| Internal training   | Combined model | 0.053159237 | 0.228280305 | 0.004947035           | 1.002457344       |
| Internal training   | Logical Score  | 0.241958313 | 0.001521464 | 0.214546564           | 1.442510534       |
| Internal training   | Tumor Score    | 0.247919493 | 0.000000478 | 0.462016401           | 1.392027217       |
| Internal training   | Tenon Score    | 0.228487887 | 0.049813624 | -0.256470011          | 1.530215185       |
| Internal validation | Combined model | 0.061141014 | 0.669602028 | 0.001334471           | 1.001444851       |
| Internal validation | Logical Score  | 0.222182631 | 0.000456993 | 0.245843947           | 2.608065132       |
| Internal validation | Tumor Score    | 0.240967821 | 0.002414427 | 0.335548805           | 4.739660185       |
| Internal validation | Tenon Score    | 0.210623272 | 0.014237474 | -0.206374517          | 1.287954034       |
| External validation | Combined model | 0.045184209 | 0.650432209 | -0.000959001          | 1.007731584       |
| External validation | Logical Score  | 0.242671229 | 0.004756305 | -0.29574794           | 0.462503937       |
| External validation | Tumor Score    | 0.241107247 | 0.053050407 | 0.456403858           | 5.0121627         |
| External validation | Tenon Score    | 0.210868022 | 0.003548492 | -0.346218392          | 1.40391525        |

Supplementary table 3 DCA performance in different cohort(Combined model as reference)

| Cohort            | Compare (Reference=Combined model) | NRI          | NRI 95%CI Lower | NRI 95%CI Upper | IDI          | IDI 95%CI Lower | IDI 95%CI Upper |
|-------------------|------------------------------------|--------------|-----------------|-----------------|--------------|-----------------|-----------------|
| Internal training | Logical Score                      | -<br>1.68278 | -1.81316        | -1.53303        | -<br>0.66039 | -0.71436        | -0.60555        |
| Internal training | Tumor Score                        | -1.6855      | -1.81597        | -1.54318        | -<br>0.70554 | -0.7551         | -0.64972        |

|                     |               |              |          |          |              |          |          |
|---------------------|---------------|--------------|----------|----------|--------------|----------|----------|
| Internal training   | Tenon Score   | -<br>1.56027 | -1.72252 | -1.38813 | -<br>0.59383 | -0.64842 | -0.53359 |
| Internal validation | Logical Score | -<br>1.57551 | -1.83127 | -1.29584 | -<br>0.61725 | -0.71357 | -0.5079  |
| Internal validation | Tumor Score   | -<br>1.57879 | -1.83591 | -1.32652 | -<br>0.70796 | -0.79213 | -0.61196 |
| Internal validation | Tenon Score   | -<br>1.31982 | -1.61131 | -0.99283 | -<br>0.55665 | -0.66352 | -0.44115 |
| External validation | Logical Score | -<br>1.70251 | -1.88549 | -1.49006 | -<br>0.68879 | -0.76526 | -0.6051  |
| External validation | Tumor Score   | -<br>1.66887 | -1.85351 | -1.44419 | -<br>0.71431 | -0.78243 | -0.63532 |
| External validation | Tenon Score   | -<br>1.50379 | -1.72004 | -1.26139 | -<br>0.59646 | -0.66796 | -0.51208 |

---

NRI: Net Reclassification Improvement. IDI: Integrated Discrimination Improvement. CI: Confidence Interval
